# Supplementary material
Source: MDPI journal article supplement (https://www.mdpi.com/2297-8739/8/12/232)
Supplement: s1 [file s1]

*Supplementary materials*

# Development of a Method for the Measurement of Human Scent Samples Using Comprehensive Two-dimensional Gas Chromatography with Mass Detection

Petra Pojmanová \*, Nikola Ladislavová and Štěpán Urban

Department of Analytical Chemistry, Faculty of Chemical Engineering, University of Chemistry and Technology, Prague, Technická 5, 166 28 Prague, Czech Republic; ladislan@vscht.cz (N.L.); urbans@vscht.cz (Š.U.)

\* Correspondence: petra.pojmanova@vscht.cz

**Table S1.** The list of the standards in a model mixture of human skin scent and measured retention indices on systems with a 2 m pre-column, a 30 m primary column and a 1 m secondary column.

| Compounds                                     | Molecular weight | Chemical family          | Retention indices     |                     |                      |                    |
|-----------------------------------------------|------------------|--------------------------|-----------------------|---------------------|----------------------|--------------------|
|                                               |                  |                          | Rxi-5ms /Rxi-17Sil MS | Rxi-5ms /Rtx-200 MS | Rxi-17Sil MS /TG-5HT | Rtx-200 MS /TG-5HT |
| Hexanoic acid                                 | 116.16           | Acids                    | 1011.3                | 1015.1              | 1112.9               | 1130.8             |
| 2-Octanone                                    | 128.21           | Ketones                  | 991.33                | 994.00              | 1108.3               | 1190.3             |
| Octanal                                       | 128.21           | Aldehydes                | 1002.5                | 1004.6              | 1119.7               | 1178.4             |
| Heptanoic acid                                | 130.18           | Acids                    | 1098.0                | 1107.2              | 1206.3               | 1233.3             |
| 2-Nonanone                                    | 142.24           | Ketones                  | 1093.5                | 1091.8              | 1210.9               | 1290.7             |
| Decane                                        | 142.29           | Alkanes                  | 1000.0                | 1000.0              | 1000.0               | 1000.0             |
| Octanoic acid                                 | 144.21           | Acids                    | 1192.2                | 1197.9              | 1300.5               | 1326.0             |
| Nonanal                                       | 145.24           | Aldehydes                | 1104.8                | 1102.6              | 1220.2               | 1283.0             |
| 2-Decanone                                    | 156.27           | Ketones                  | 1193.4                | 1193.4              | 1309.3               | 1398.2             |
| Decanal                                       | 156.27           | Aldehydes                | 1205.0                | 1207.3              | 1321.8               | 1385.8             |
| Undecane                                      | 156.31           | Alkanes                  | 1100.0                | 1100.0              | 1100.0               | 1100.0             |
| Nonanoic acid                                 | 158.24           | Acids                    | 1290.7                | 1288.6              | 1401.9               | 1424.6             |
| 2-Undecanone                                  | 170.29           | Ketones                  | 1293.0                | 1293.3              | 1412.1               | 1502.6             |
| Undecanal                                     | 170.29           | Aldehydes                | 1307.7                | 1305.4              | 1424.9               | 1493.9             |
| Dodecanal                                     | 170.29           | Aldehydes                | 1408.3                | 1408.4              | 1524.3               | 1598.1             |
| Dodecane                                      | 170.33           | Alkanes                  | 1200.0                | 1200.0              | 1200.0               | 1200.0             |
| Decanoic acid                                 | 172.26           | Acids                    | 1385.2                | 1387.4              | 1499.3               | 1530.2             |
| 1-Chlorodecane                                | 176.73           | Chlorinated hydrocarbons | 1264.4                | 1265.2              | 1344.5               | 1349.0             |
| 2-Dodecanone                                  | 184.32           | Ketones                  | 1392.7                | 1395.2              | 1513.2               | 1607.8             |
| Tridecane                                     | 184.37           | Alkanes                  | 1300.0                | 1300.0              | 1300.0               | 1300.0             |
| Undecanoic acid                               | 186.29           | Acids                    | 1478.6                | 1484.0              | 1596.5               | 1628.3             |
| 1-Dodecanol                                   | 186.34           | Alcohols                 | 1475.9                | 1475.8              | 1582.7               | 1585.1             |
| Caffeine                                      | 194.19           | Others                   | 1855.2                | 1857.4              | 2342.4               | 2250.8             |
| 6,10-Dimethyl-5,9-undecadien-2-one (isomer 1) | 194.32           | Ketones                  | 1435.5                | 1435.4              | 1588.1               | 1637.9             |
| 6,10-Dimethyl-5,9-undecadien-2-one (isomer 2) | 194.32           | Ketones                  | 1454.4                | 1451.7              | 1613.4               | 1662.8             |
| 2-Tridecanone                                 | 198.34           | Ketones                  | 1494.8                | 1497.6              | 1616.5               | 1717.8             |
| Tridecanal                                    | 198.35           | Aldehydes                | 1512.0                | 1511.7              | 1627.9               | 1707.9             |
| Tetradecane                                   | 198.39           | Alkanes                  | 1400.0                | 1400.0              | 1400.0               | 1400.0             |
| Dodecanoic acid                               | 200.32           | Acids                    | 1579.7                | 1577.4              | 1696.5               | 1733.3             |
| 1-Chlorododecane                              | 204.78           | Chlorinated hydrocarbons | 1470.4                | 1470.4              | 1549.5               | 1558.0             |

| hydrocarbons                               |        |          |        |        |        |        |
|--------------------------------------------|--------|----------|--------|--------|--------|--------|
|                                            |        |          |        |        |        |        |
| Pentadecane                                | 212.42 | Alkanes  | 1500.0 | 1500.0 | 1500.0 | 1500.0 |
| N,N-Dimethyldodecylamine                   | 213.40 | Amines   | 1508.9 | 1511.5 | 1549.7 | 1544.9 |
| Tridecanoic acid                           | 214.34 | Acids    | 1674.5 | 1673.7 | 1796.3 | 1835.0 |
| 1-Tetradecanol                             | 214.39 | Alcohols | 1680.2 | 1679.5 | 1787.3 | 1793.6 |
| 2-Pentadecanone                            | 226.4  | Ketones  | 1700.2 | 1700.3 | 1818.7 | 1925.4 |
| Hexadecane                                 | 226.41 | Alkanes  | 1600.0 | 1600.0 | 1600.0 | 1600.0 |
| Benzyl salicylate                          | 228.24 | Others   | 1877.7 | 1880.4 | 2221.8 | 2120.6 |
| Oxybenzone                                 | 228.25 | Others   | 2037.1 | 2037.6 | 2465.2 | 2355.4 |
| Tetradecanoic acid                         | 228.37 | Acids    | 1771.2 | 1774.4 | 1902.6 | 1936.9 |
| Chlorinated hydrocarbons                   |        |          |        |        |        |        |
| 1-Chlorotetradecane                        | 232.83 |          | 1677.3 | 1676.6 | 1757.1 | 1768.8 |
| ns                                         |        |          |        |        |        |        |
| Heptadecane                                | 240.47 | Alkanes  | 1700.0 | 1700.0 | 1700.0 | 1700.0 |
| N,N-Dimethyltetradecylamine                | 241.46 | Amines   | 1706.5 | 1706.5 | 1748.2 | 1744.4 |
| Pentadecanoic acid                         | 242.40 | Acids    | 1873.6 | 1873.5 | 1999.3 | 2035.2 |
| 1-Hexadecanol                              | 242.44 | Alcohols | 1883.5 | 1883.5 | 1992.7 | 1998.5 |
| 2-Ethylhexyl salicylate                    | 250.33 | Others   | 1810.4 | 1813.7 | 1992.5 | 2027.0 |
| Pentacosane                                | 252.69 | Alkanes  | 2500.0 | 2500.0 | 2500.0 | 2500.0 |
| Octadecane                                 | 254.49 | Alkanes  | 1800.0 | 1800.0 | 1800.0 | 1800.0 |
| Hexadecanoic acid                          | 256.42 | Acids    | 1972.7 | 1970.2 | 2110.0 | 2144.1 |
| Chlorinated hydrocarbons                   |        |          |        |        |        |        |
| 1-Chlorohexadecane                         | 260.90 |          | 1883.6 | 1883.4 | 1966.2 | 1976.5 |
| ns                                         |        |          |        |        |        |        |
| Homosalate                                 | 262.36 | Others   | 1893.8 | 1897.1 | 2099.1 | 2128.4 |
| 2-Octadecanone                             | 268.48 | Ketones  | 2007.4 | 2004.0 | 2127.9 | 2242.6 |
| Nonadecane                                 | 268.52 | Alkanes  | 1900.0 | 1900.0 | 1900.0 | 1900.0 |
| N,N-Dimethylhexadecylamine                 | 269.51 | Amines   | 1906.9 | 1910.0 | 1946.4 | 1943.9 |
| Heptadecanoic acid                         | 270.45 | Acids    | 2071.7 | 2070.5 | 2203.1 | 2243.1 |
| Isopropyl myristate                        | 270.46 | Esters   | 1826.8 | 1830.2 | 1909.4 | 1981.4 |
| 1-Octadecanol                              | 270.49 | Alcohols | 2085.9 | 2089.0 | 2199.4 | 2207.3 |
| Oleic Acid                                 | 282.47 | Acids    | 2169.5 | 2146.3 | 2311.2 | 2331.1 |
| Eicosane                                   | 282.55 | Alkanes  | 2000.0 | 2000.0 | 2000.0 | 2000.0 |
| Octadecanoic acid                          | 284.48 | Acids    | 2169.5 | 2169.4 | 2311.2 | 2347.9 |
| 2-Ethylhexyl 4-methoxycinnamate (isomer 1) | 290.40 | Others   | 2170.1 | 2169.6 | 2482.1 | 2424.4 |
| 2-Ethylhexyl 4-methoxycinnamate (isomer 2) | 290.40 | Others   | 2322.7 | 2325.5 | 2652.0 | 2646.4 |
| Heneicosane                                | 296.57 | Alkanes  | 2100.0 | 2100.0 | 2100.0 | 2100.0 |
| N,N-Dimethyloctadecanamine                 | 297.56 | Amines   | 2107.8 | 2111.6 | 2149.7 | 2138.0 |

|                                               |        |         |        |        |        |        |
|-----------------------------------------------|--------|---------|--------|--------|--------|--------|
| <b>Nonadecanoic acid</b>                      | 298.50 | Acids   | 2269.5 | 2269.3 | 2411.7 | 2443.2 |
| <b>Docosane</b>                               | 310.60 | Alkanes | 2200.0 | 2200.0 | 2200.0 | 2200.0 |
| <b>Eicosanoic acid</b>                        | 312.53 | Acids   | 2395.9 | 2370.9 | 2516.2 | 2557.4 |
| <b>Hexadecanoic acid, butyl ester</b>         | 312.54 | Esters  | 2188.7 | 2188.6 | 2287.9 | 2348.0 |
| <b>Tricosane</b>                              | 324.63 | Alkanes | 2300.0 | 2300.0 | 2300.0 | 2300.0 |
| <b>Tetracosane</b>                            | 338.65 | Alkanes | 2400.0 | 2400.0 | 2400.0 | 2400.0 |
| <b>Docosanamide</b>                           | 339.60 | Amides  | 2810.8 | 2810.6 | 2777.3 | 2884.3 |
| <b>Octadecanoic acid, butyl ester</b>         | 340.59 | Esters  | 2391.5 | 2391.8 | 2491.1 | 2557.6 |
| <b>Octocrylene</b>                            | 361.48 | Others  | 2678.7 | 2691.3 | 3123.2 | 3166.3 |
| <b>Tetraethylene glycol monododecyl ether</b> | 362.54 | Ethers  | 2548.6 | 2550.3 | 2848.6 | 2786.9 |
| <b>Hexacosane</b>                             | 366.71 | Alkanes | 2600.0 | 2600.0 | 2600.0 | 2600.0 |
| <b>Heptacosane</b>                            | 380.73 | Alkanes | 2700.0 | 2700.0 | 2700.0 | 2700.0 |
| <b>Cholesterol</b>                            | 386.65 | Others  | 3134.8 | 3133.8 | 3509.4 | 3379.7 |
| <b>Octacosane</b>                             | 394.77 | Alkanes | 2800.0 | 2800.0 | 2800.0 | 2800.0 |
| <b>Tetradecanoic acid, dodecyl ester</b>      | 396.69 | Esters  | 2770.3 | 2776.4 | 2870.9 | 2952.8 |
| <b>Pentaethylene glycol monododecyl ether</b> | 406.60 | Ethers  | 2831.0 | 2830.3 | 3173.2 | 3096.3 |
| <b>Nonacosane</b>                             | 408.80 | Alkanes | 2900.0 | 2900.0 | 2900.0 | 2900.0 |
| <b>Squalene</b>                               | 410.73 | Others  | 2835.4 | 2840.0 | 2977.8 | 2822.3 |
| <b>9-Hexadecenoic acid, dodecyl ester</b>     | 422.73 | Esters  | 2955.3 | 2960.2 | 3083.9 | 3140.0 |
| <b>Triacontane</b>                            | 422.82 | Alkanes | 3000.0 | 3000.0 | 3000.0 | 3000.0 |
| <b>Tetradecanoic acid, tetradecyl ester</b>   | 424.74 | Esters  | 2970.2 | 2975.2 | 3076.3 | 3154.4 |
| <b>Hentriacontane</b>                         | 436.85 | Alkanes | 3100.0 | 3100.0 | 3100.0 | 3100.0 |
| <b>Hexaethylene glycol monododecyl ether</b>  | 450.65 | Ethers  | 3101.4 | 3100.4 | 3508.9 | 3428.1 |
| <b>Dotriacontane</b>                          | 450.87 | Alkanes | 3200.0 | 3200.0 | 3200.0 | 3200.0 |
| <b>Tetradecanoic acid, hexadecyl ester</b>    | 452.80 | Esters  | 3166.9 | 3166.9 | 3266.9 | 3347.0 |
| <b>Octadecanoic acid, dodecyl ester</b>       | 452.80 | Esters  | 3166.9 | 3166.9 | 3266.9 | 3347.0 |
| <b>Trtriacontane</b>                          | 464.89 | Alkanes | 3300.0 | 3300.0 | 3300.0 | 3300.0 |
| <b>Tetratriacontane</b>                       | 478.93 | Alkanes | 3400.0 | 3400.0 | 3400.0 | 3400.0 |
| <b>Hexadecanoic acid, hexadecyl ester</b>     | 480.85 | Esters  | 3370.9 | 3366.9 | 3474.2 | 3563.2 |
| <b>Pentatriacontane</b>                       | 492.96 | Alkanes | 3500.0 | 3500.0 | 3500.0 | 3500.0 |
| <b>Hexatriacontane</b>                        | 506.97 | Alkanes | 3600.0 | 3600.0 | 3600.0 | 3600.0 |
| <b>Hexadecanoic acid, octadecyl ester</b>     | 508.90 | Esters  | 3569.2 | 3570.8 | 3674.0 | 3763.0 |
| <b>Heptatriacontane</b>                       | 520.99 | Alkanes | 3700.0 | 3700.0 | 3700.0 | 3700.0 |
| <b>Octatriacontane</b>                        | 535.03 | Alkanes | 3800.0 | 3800.0 | 3800.0 | 3800.0 |
| <b>Octadecanoic acid, octadecyl ester</b>     | 536.96 | Esters  | 3763.6 | 3772.6 | 3869.0 | 3962.8 |
| <b>Nonatriacontane</b>                        | 549.05 | Alkanes | 3900.0 | 3900.0 | 3900.0 | 3900.0 |
| <b>Tetracontane</b>                           | 563.08 | Alkanes | 4000.0 | 4000.0 | 4000.0 | 4000.0 |
